# The predictive efficacy of hypoechoic lesion in ultrasound for prostate cancer in Chinese people: five-year experience in a moderated 10-core transperineal prostate biopsy procedure

Tian Yang<sup>1,3,\*</sup>, Limin Zhang<sup>2,3,\*</sup>, Yixin Chen<sup>4,\*</sup>, Yehua Cai<sup>4</sup>, Haowen Jiang<sup>1,3</sup> and Qiang Ding<sup>1,3</sup>

<sup>1</sup>Department of Urology, Huashan Hospital, Fudan University, Shanghai, China

<sup>2</sup>Department of Urology, Huashan North Hospital, Fudan University, Shanghai, China

<sup>3</sup>Fudan Institute of Urology, Huashan Hospital, Fudan University, Shanghai, China

<sup>4</sup>Department of Ultrasonography, Huashan Hospital, Fudan University, Shanghai, China

\*These authors contributed equally to this work

**Correspondence to:** Limin Zhang, **email:** alexzlm1126@126.com  
Haowen Jiang, **email:** urology\_jhw@126.com

**Keywords:** PSA, transperineal prostate biopsy, prostate cancer, transrectal ultrasound, hypoechoic lesion

**Received:** February 07, 2017

**Accepted:** May 21, 2017

**Published:** June 02, 2017

Copyright: Yang et al. This is an open-access article distributed under the terms of the Creative Commons Attribution License 3.0 (CC BY 3.0), which permits unrestricted use, distribution, and reproduction in any medium, provided the original author and source are credited.

## ABSTRACT

**We aim to investigate the predictive efficacy of hypoechoic lesion for prostate cancer at different levels of serum PSA in the procedure of transrectal ultrasound guided 10-core trans-perineal prostate biopsy (TP-PBx). In this study, we collected clinical parameters involving age, digital rectal examination (DRE), PSA, prostate volume, pathological diagnosis, Gleason score, novel Gleason group, and numbers of positive cores from 856 patients who had elevated level of PSA above 4 ng/ml or susceptible nodule of prostate gland in DRE received the moderated 10-core TP-PBx procedure. There were 481 cases (56.2%) with no visible lesion of hypoechoic nodule in transrectal ultrasound (TRUS) and 375 cases (43.8%) with the hypoechoic lesion. The total cancer detection rate is 45.56%. The predictive efficacy of hypoechoic lesion for prostate cancer varies among different PSA intervals. For PSA groups of 0–4, 4–10, 10–20, 20–100, > 100 ng/ml, the Youden's indexes are 0.3483, 0.3506, 0.3941, 0.2795 and 0.8667, respectively. Besides, the visible lesions are inclined to be detected in patients with higher Gleason score. We concluded that the hypoechoic lesions in TRUS could improve the predictive accuracy for diagnosing prostate cancer and present different predictive efficacy in the respective PSA intervals. Besides, it was probably associated with more aggressive clinical significance.**

## INTRODUCTION

Prostate cancer (PCa) is one of the most frequently diagnosed malignant tumors and the second cause of cancer death among men worldwide [1]. The American Cancer Society estimates that in 2011, 240,890 men were diagnosed with PCa and 33,720 men died of it in United States [2]. The incidence of PCa was once relatively rare in Asia. In 1991, an epidemiological study reported a 26-fold higher rate of PCa in American than in Chinese men

with an intermediate rate in Chinese-American men [3]. However, in the past few years, the prevalence of PCa has been increasing in China with the annual percentage change of 12.6%, highest among all types of male cancer from 2000 to 2011 [4–5]. In 2015, it is estimated that nearly 60,300 new PCa cases and 26,600 cancer deaths related to PCa occur in China [5]. Factors including earlier and frequent prostate-specific antigen (PSA) screening, improved skills of biopsy and western diet habit may explain this situation [5].

TRUS technology has become a mainstay of many image guided prostate interventions, including prostate biopsy, brachytherapy, cryotherapy, and high-intensity focused US [6]. Today PSA-based screening of asymptomatic men has resulted in the adaptation of TRUS biopsy as the standard of care when prostate biopsy is used to identify prostate cancer [6]. Since the introduction of the TRUS probe by Watanabe et al. [7, 8] and the development of the diagnostic procedure first applied in 1981 by Holm and Gammelgard [9], the value of TRUS for the detection and evaluation of PCa has been reported [10, 11]. However, the diagnostic efficacy of ultrasound for PCa has been a matter of debate in the past few decades [12, 13].

Although TRUS owns the disadvantage of poor specificity of abnormalities and the difficulty on the differentiation of tumor and adjacent benign tissues [14], it improves visualization of prostate lesions and is routinely used by most urologists for the diagnosis and staging of localized prostate cancer. Nowadays, it is widely accepted that 60–70% of prostate cancers are hypoechoic, and about 30–40% are isoechoic or nonvisible [15, 16]. Prostate cancer originating in hyperechoic lesions are extremely rare with an incidence of 1% to 1.5% [17–20]. Only a few cases were described in the literature which were related to desmoplastic reaction of the prostate cancer [21].

The early detection of prostate cancer, especially the cases with clinical significance, is surely the keystone for the disease control. High levels of serum PSA, abnormal digital rectal examination (DRE) findings and hypoechoic lesions found during TRUS are the typical signs considered to be suspected for PCa, and TRUS guided prostate biopsy is recommended subsequently. In China, due to the regional disequilibrium in the social economic support and the accessibility of high standard healthcare, PSA test and conventional ultrasound-guided prostate biopsy will remain to be the major diagnostic tools for prostate cancer for quite a period of time.

In this study, we included different PSA intervals and scaled hypoechoic lesions as different types of the region of interest (ROI) in order to evaluate the validity of hypoechoic lesion in ultrasound as a predictive factor for PCa in Chinese patients.

## RESULTS

Among 856 cases who met the criteria, 481 (56.2%) cases didn't have visible lesion of hypoechoic nodule in TRUS and 375 (43.8%) cases had hypoechoic lesion. None of the cases had hyperechoic nodule. The total cancer detection rate was 45.56%. The detection rate of hypoechoic lesion in TRUS was 68.53%. The baseline characteristics of study population were shown in Table 1. A higher age, elevated PSA, smaller prostate volume and malignant pathological diagnosis were all significantly associated with hypoechoic lesions. Multivariate analysis of

factors predicting PCa was shown in Table 2. Hypoechoic lesion (OR = 2.989, 95% CI = 2.018–4.427,  $p < 0.001$ ) was also found independently associated with PCa.

Binary logistic regression analysis was conducted to compare the predictive accuracy for predicting models with and without hypoechoic lesion. When hypoechoic lesion was included in the regression model, the -2 likelihood ratio, Cox & Snell  $R^2$  and Nagelkerke  $R^2$  were 693.55, 0.423 and 0.565, respectively. When hypoechoic lesion was excluded in the regression model, the -2 likelihood ratio, Cox & Snell  $R^2$  and Nagelkerke  $R^2$  were 723.52, 0.402, and 0.537, respectively. This result showed that hypoechoic lesion could improve the predictive accuracy for diagnosing PCa.

The proportion of different PSA intervals in all patients and in patients with PCa was shown in Figure 1. The sensitivity, specificity, positive predict value (PPV) and negative predict value (NPV) of hypoechoic lesion for PCa in all patients were 65.90%, 74.68%, 68.53% and 72.50%. The predictive efficacy of hypoechoic lesion for PCa varied among different PSA intervals. The sensitivity, specificity, PPV and NPV were 90.91%, 44.83%, 38.46%, 92.86% when PSA was less than 4 ng/ml. When PSA ranged from 4–10 ng/ml, the sensitivity, specificity, PPV, NPV were respectively 58.18%, 76.88%, 41.03%, and 78.35%. In the group with PSA 10–20 ng/ml, those four values were 59.41%, 80.00%, 64.52%, and 76.30%. In the group with PSA 20–100 ng/ml, the 4 values were 60.81%, 67.14%, 79.64%, and 44.76%. In the last interval of PSA more than 100 ng/ml, the 4 values were 86.67%, 100%, 65.00%, 23.08% (Table 3). The Youden's indexes of the five PSA groups were 0.3483, 0.3506, 0.3941, 0.2795 and 0.8667, respectively. The comparison of detecting cancer by different ROI types with respective PSA intervals was presented in Table 4. In patients with PSA > 20 ng/ml, the detection rate was significantly associated with ROI groups.

The relationship between hypoechoic lesion and Gleason scores in different PSA intervals was shown in Table 5. As we can see from the table, the hypoechoic lesions were inclined to be detected in patients with higher Gleason score. In patients with PSA > 20 ng/ml, hypoechoic lesions were significantly associated with Gleason Group.

## DISCUSSION

Prostate cancer is a very common malignant disease and its incidence increases with age. Nowadays, TRUS-guided biopsy is still the only accurate preoperative method for early diagnosis of prostate cancer [22]. Besides having a great importance in guiding the needle direction for prostate biopsy, TRUS allows the visualization of suspected focal lesions of prostate cancer [23, 24]. A study [25] revealed prostate cancer was detected in 25.5% with a hypoechoic lesion through transrectal ultrasound directed prostatic biopsies. Another study [26] found that biopsy samples taken when a prostate lesion is

**Table 1: Baseline clinical characteristics of study population**

|                               | No Visible lesion of<br>hypoechoic nodule in<br>TRUS †<br>(No. of cases = 481) | Hypoechoic lesion in<br>TRUS<br>(No. of cases = 375) | Significance    |
|-------------------------------|--------------------------------------------------------------------------------|------------------------------------------------------|-----------------|
| <b>Age (yrs)</b>              |                                                                                |                                                      |                 |
| Mean ± SD‡                    | 68.88 ± 8.56                                                                   | 71.09 ± 8.39                                         | <i>P</i> = 0.00 |
| Median (range interquartile)  | 69 (13)                                                                        | 71 (12)                                              |                 |
| <b>PSA§ (ng/ml)</b>           |                                                                                |                                                      |                 |
| Mean ± SD                     | 25.65 ± 98.69                                                                  | 92.07 ± 247.83                                       | <i>P</i> = 0.00 |
| Median (range interquartile)  | 11.59 (12.04)                                                                  | 18.04 (50.22)                                        |                 |
| <b>DRE*</b>                   |                                                                                |                                                      |                 |
| Negative                      | 450                                                                            | 199                                                  | <i>P</i> = 0.00 |
| Unilateral nodule             | 28                                                                             | 109                                                  |                 |
| Bilateral nodule              | 3                                                                              | 67                                                   |                 |
| <b>Prostate volume (ml)</b>   |                                                                                |                                                      |                 |
| Mean ± SD                     | 55.65 ± 25.49                                                                  | 46.67 ± 23.19                                        | <i>P</i> = 0.00 |
| <b>Pathological diagnosis</b> |                                                                                |                                                      |                 |
| Malignant                     | 133                                                                            | 257                                                  | <i>P</i> = 0.00 |
| Benign                        | 348                                                                            | 118                                                  |                 |
| <b>Gleason score</b>          |                                                                                |                                                      |                 |
| 6                             | 51                                                                             | 33                                                   |                 |
| 3 + 4 = 7                     | 24                                                                             | 49                                                   |                 |
| 4 + 3 = 7                     | 29                                                                             | 73                                                   |                 |
| 8                             | 19                                                                             | 47                                                   |                 |
| 9 – 10                        | 10                                                                             | 55                                                   |                 |

†TRUS: transrectal ultrasound.

‡SD: standard deviation.

§PSA: prostate specific antigen.

\*DRE: digital rectal examination.

**Table 2: Multivariate analysis of factors predicting prostate cancer**

|                   | Odds Ratio | <i>P</i> | Lower CI† | Upper CI |
|-------------------|------------|----------|-----------|----------|
| Age               | 1.076      | 0.00     | 1.051     | 1.102    |
| PSA               | 1.044      | 0.00     | 1.032     | 1.056    |
| Prostate volume   | 0.954      | 0.00     | 0.944     | 0.964    |
| Hypoechoic lesion | 2.989      | 0.00     | 2.018     | 4.427    |

†CI: confidence interval.

identified by TRUS are almost twice as likely to show cancer than when no lesion is visible, These two studies concluded that the search for and targeting of hypoechoic lesions on TRUS remains important for PCa diagnosis. Hypoechoic lesions can also be detected in other diseases including granulomatous prostatitis, prostatic infarct and lymphoma [27]. Therefore, it is necessary to perform a biopsy on hypoechoic lesions. In our study, 68.53% of the patients with hypoechoic lesions were diagnosed as

PCa by 10-core TP-PBx. The detection rate was a little higher than the recent reports with the detection rate of about 62.9%–67.2% by the same biopsy method [28, 29]. The reasons may attribute to our larger population and different skills of urologists in different medical centers.

In order to investigate the relationship between PCa and hypoechoic lesions further, we reclassified the patients according to different PSA intervals. We found that hypoechoic lesions were significantly associated with the

**Table 3: The predictive efficacy of hypoechoic lesion for prostate cancer among different PSA intervals**

| PSA intervals (ng/ml) |                   | Cancer | Non-cancer | Sensitivity (%) | Specificity (%) | PPV <sup>†</sup> (%) | NPV <sup>‡</sup> (%) | P value |
|-----------------------|-------------------|--------|------------|-----------------|-----------------|----------------------|----------------------|---------|
| 0–4                   | no visible lesion | 1      | 13         | 90.91           | 44.83           | 38.46                | 92.86                | 0.03    |
|                       | hypoechoic lesion | 10     | 16         |                 |                 |                      |                      |         |
| 4–10                  | no visible lesion | 23     | 153        | 58.18           | 76.88           | 41.03                | 78.35                | 0.00    |
|                       | hypoechoic lesion | 32     | 46         |                 |                 |                      |                      |         |
| 10–20                 | no visible lesion | 41     | 132        | 59.41           | 80.00           | 64.52                | 76.30                | 0.00    |
|                       | hypoechoic lesion | 60     | 33         |                 |                 |                      |                      |         |
| 20–100                | no visible lesion | 58     | 47         | 60.81           | 67.14           | 79.64                | 44.76                | 0.00    |
|                       | hypoechoic lesion | 90     | 23         |                 |                 |                      |                      |         |
| >100                  | no visible lesion | 10     | 3          | 86.67           | 100             | 65.00                | 23.08                | 0.00    |
|                       | hypoechoic lesion | 65     | 0          |                 |                 |                      |                      |         |

<sup>†</sup>PPV: positive predict value.

<sup>‡</sup>NPV: negative predict value.

**Table 4: The comparison of detecting cancer by different ROI<sup>†</sup> types with respective PSA intervals**

| PSA intervals (ng/ml) |            | ROI = 1 (N = 175) |                | ROI = 2 (N = 41) |                | ROI = 3 (N = 40) |                | ROI = 4 (N = 87) |                | ROI = 5 (N = 32) |                | P value |
|-----------------------|------------|-------------------|----------------|------------------|----------------|------------------|----------------|------------------|----------------|------------------|----------------|---------|
|                       |            | cases             | Detection rate | cases            | Detection rate | cases            | Detection rate | cases            | Detection rate | cases            | Detection rate |         |
| 0–10                  | Cancer     | 29                | 35.80%         | 0                | 0              | 2                | 100%           | 4                | 66.67%         | 7                | 63.64%         | > 0.05  |
|                       | Non-cancer | 52                |                | 4                |                | 0                |                | 2                |                | 4                |                |         |
| 10–20                 | Cancer     | 25                | 51.02%         | 12               | 66.67%         | 5                | 83.33%         | 10               | 90.90%         | 8                | 88.89%         | > 0.05  |
|                       | Non-cancer | 24                |                | 6                |                | 1                |                | 1                |                | 1                |                |         |
| > 20                  | Cancer     | 27                | 60.00%         | 18               | 94.74%         | 32               | 100%           | 67               | 95.71%         | 11               | 91.67%         | < 0.01  |
|                       | Non-cancer | 18                |                | 1                |                | 0                |                | 3                |                | 1                |                |         |

<sup>†</sup>ROI: region of interest.

**Table 5: The relationship between hypoechoic lesion and Gleason scores in different PSA intervals**

| PSA intervals (ng/ml) |                   | Gleason Group 1 | Gleason Group 2 | Gleason Group 3 | Gleason Group 4 | Gleason Group 5 | P value |
|-----------------------|-------------------|-----------------|-----------------|-----------------|-----------------|-----------------|---------|
| 0–10                  | no visible lesion | 14              | 3               | 5               | 2               | 0               | > 0.05  |
|                       | hypoechoic lesion | 12              | 10              | 15              | 2               | 3               |         |
| 10–20                 | no visible lesion | 16              | 8               | 11              | 6               | 0               | > 0.05  |
|                       | hypoechoic lesion | 14              | 12              | 16              | 10              | 8               |         |
| > 20                  | no visible lesion | 21              | 13              | 13              | 11              | 10              | < 0.01  |
|                       | hypoechoic lesion | 7               | 27              | 42              | 35              | 44              |         |

diagnosis of PCa in all the PSA intervals and had the highest predictive efficacy in patients with PSA > 100 ng/ml, as expected, followed by PSA 10–20, PSA 4–10, PSA < 4 and PSA 20–100 ng/ml groups. When we divided ultrasound results into different ROI types, similar results were also found in patients with PSA > 20 ng/ml, which confirmed the diagnostic value of hypoechoic lesion. Few studies examined the utility of hypoechoic lesion, a TRUS-related indicator of potentially prostate cancer, as a risk factor in different PSA intervals. Our study may provide a new dimension into the diagnostic value of hypoechoic lesion in prostate cancer. More confirmatory studies are needed in the future.

In our study, patients who had hypoechoic lesions on TRUS had a higher Gleason Grade group than those who didn't, especially for patients with PSA > 20 ng/ml. This result was consensus with other studies [30]. Ellis and Brawer [31] also confirmed that Gleason score was independent of ultrasound findings. Newton et al. [32]

summarized that prostate volume is inversely associated with high-grade PCa as well as extraprostatic extension and positive surgical margins. We also found that patients with hypoechoic lesions tended to have smaller prostate volume.

The multi-parametric MRI is another important examination for the diagnosis and treatment of PCa, especially targeted prostate biopsy [33]. Compared to TRUS, multi-parametric MRI owns better tissue resolution. It can compare the relative signal intensity within the prostate and identify lesions with poorly defined or irregular borders, which may have a higher suspicion of cancer [6, 34]. Therefore, multi-parametric MRI has a higher accuracy in the detection of clinically significant PCa than TRUS [35]. However, unlike ultrasound, the process of MRI examination is static and urologists can't get dynamic images of prostate through MRI. Besides, ultrasound owns almost no contraindications and has a less economic burden on patients, which is more suitable and popular in China.

Recently, the use of transperineal template biopsies of the prostate (TTBP) has attracted many urologists and several studies have been published in the literature to explore this procedure [36, 37]. TTBP is a more invasive procedure than TRUS guided biopsy. An average of 58 core biopsies per patient is considered acceptable for mapping TTBP [38]. A study compared the diagnostic accuracy of TRUS-guided prostate biopsy and TTBP in 124 patients who were attributed a favorable risk prostate cancer status based on previous transrectal ultrasound guided biopsy and who were considering a policy of active surveillance, showing that repeat transrectal ultrasound biopsy failed to detect up to 80% of clinically important cancers detected by TTBP [39]. Another study also indicated that TTBP could find an upgrade of Gleason score in more than 20% of patients who were diagnosed with prostate cancer by previous transrectal biopsies [40]. Although TTBP has a higher diagnostic value than conventional 10-core TRUS-guided prostatic biopsies, the average number of core biopsies taken in a mapping TTBP is significantly high and patients are more likely to suffer a degree of pain and discomfort after TTBP [41]. Besides, the complication of acute urinary retention is reported in about 17% of patients who underwent TTBP [42–44]. Therefore, it remains controversial whether TTBP can completely replace TRUS-guided biopsy. In our study, we proved that 10-core TP-PBx would also have a considerable diagnostic value when we divided patients into different ROI types and PSA intervals.

Therefore, we concluded in our study that the hypoechoic lesions in TRUS could improve the predictive accuracy for diagnosing prostate cancer and present different predictive efficacy in the respective PSA

intervals. Besides, it was probably associated with more aggressive clinical significance.

## MATERIALS AND METHODS

### Study population

From 2011.1.1 to 2015.12.15, patients who had elevated level of PSA above 4 ng/ml or susceptible nodule of prostate gland in DRE received the moderated 10-core TP-PBx procedure with the collaboration between the urologist and the physician of ultrasound medicine. Patients were informed consent. We consecutively collected 882 cases. Nine cases were excluded because of the failure of Gleason scoring and 17 cases were excluded because of the missing of PSA value. Thus, 856 cases met the criteria and were enrolled.

### Instruments

The major instruments used for the TP-PBx procedure were ultrasound scanner EUB-7500 (Hitachi) and Max-Core disposable core biopsy instrument (Bard Peripheral Vascular, Inc.)

### Method

Clinical parameters involving age, DRE, PSA, prostate volume, pathological diagnosis, Gleason score, novel Gleason group, and numbers of positive cores were documented for each patient. Patients were divided into several subgroups, according to different PSA level and transrectal ultrasound findings.

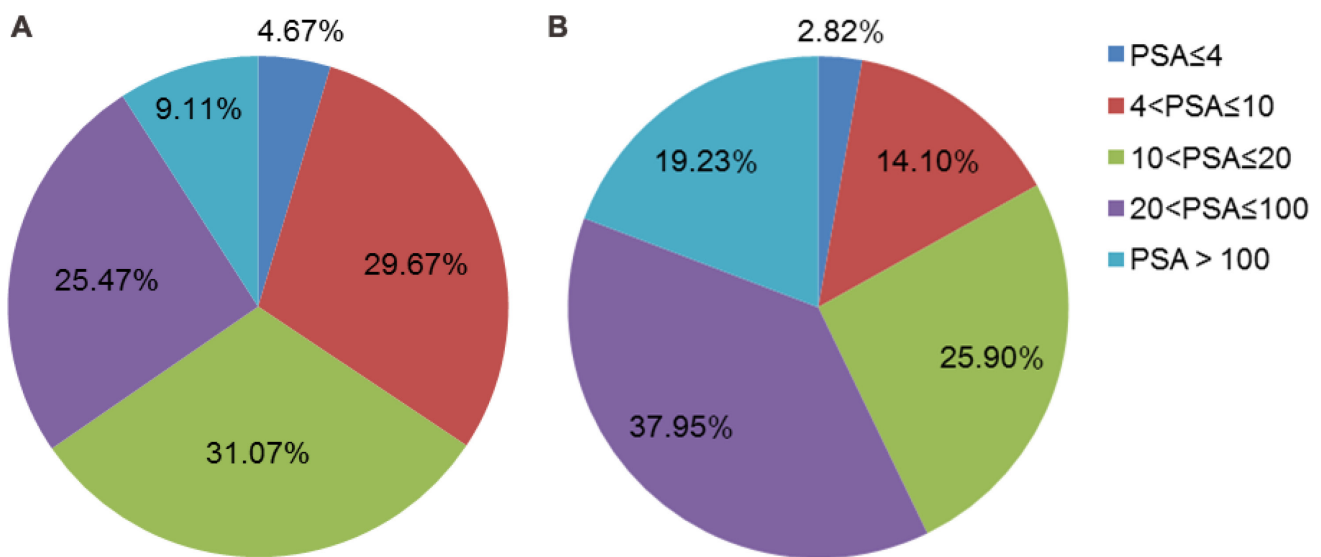

**Figure 1:** (A) The proportion of different PSA intervals in total patients ( $n = 856$ ). (B) The proportion of different PSA intervals in patients with PCa ( $n = 390$ ).

A moderated 10-core TP-PBx procedure was applied in the research. We divided the prostate gland into 10 areas in the sonographic image including the apex, base, body, posterolateral of peripheral zone and the transitional zone in lobes on both sides (Figure 2). Hypoechoic nodules were detected as the region of interest (ROI). When the ROI was located in a certain area, the free-hand targeted biopsy procedure was performed. Otherwise, the systematic TP-PBx was performed.

The biopsy specimen was formalin-fixed and paraffin-embedded. The sections were stained with hematoxylin and eosin. Two pathologists independently evaluated the sections and delivered Gleason scores to the cases of PCa, which would be judged by a superior pathologist when two pathologists made the different diagnosis. According to the novel prostate cancer grading system [45], we reclassified the patients by the new five grades based on the revised original Gleason score: group 1 (Gleason score  $\leq 6$ ), group 2 (Gleason score  $3 + 4 = 7$ ), group 3 (Gleason score  $4 + 3 = 7$ ), group 4 (Gleason score 8), and group 5 (Gleason score 9–10).

The ROI type was divided into 5 types according to the tumor stage of PCa partially. ROI type I: small nodule occupying less than the half volume of peripheral zone (PZ) in the unilateral lobe; ROI type II: the volume of the hypoechoic lesion larger than the half and less than the whole PZ in unilateral lobe; ROI type III: the lesion infiltrating the whole PZ area of one lobe; ROI type IV: the diffused invasion in bilateral lobes; ROI type V: the incidence of multiple hypoechoic lesions in the whole prostate gland.

Cox & Snell  $R^2$ , Nagelkerke  $R^2$  and -2 likelihood ratio were used to evaluate the goodness of fit of binary logistic regression model. Higher Cox & Snell  $R^2$  and Nagelkerke  $R^2$  and a lower -2 likelihood ratio indicated a better goodness of fit. PPV, NPV and Youden's index were used to evaluate the predictive efficacy of hypoechoic

lesion in predicting PCa. PPV and NPV were defined as the proportions of positive and negative results in diagnostic tests that are true positive and true negative results, respectively. PPV reflected the possibility of PCa in patients who had hypoechoic lesion in ultrasound and NPV reflected the possibility of non-PCa in patients in patients who didn't have hypoechoic lesion. Youden's index was defined as sensitivity plus specificity minus one. PPV, NPV and Youden's index were all indexes reflecting the performance of a diagnostic test. The higher the value of these indexes, the better the predictive efficacy.

Statistics analysis was conducted with the software of SPSS v20.0 (IBM Corp. U.S.A.). Continuous variables were expressed as either the mean  $\pm$  standard deviation or the median. Categorical variables were reported as the number of occurrences and frequency. The student *t*-test was used to compare the means of continuous variables between groups. Chi-square test was used to compare categorical variables. Variables that showed significant differences were included in a multivariate logistic regression analysis. Two tail *p* values of  $< 0.05$  were considered statistically significant.

There remained several limitations in our study. First, though the entire sample size of our study was not small, few patients had certain ROI type or Gleason Group in some of the PSA interval groups, which made it difficult and meaningless to analyze the diagnostic efficacy of hypoechoic lesions on TRUS. Secondly, besides hypoechoic lesion, the blood flow signal could also provide evidence in the detection of PCa. In our study, we didn't carry out the blood signal examination of ultrasound, which needs further investigation. Thirdly, this is a prospective study from single institute, which might lead to selection bias. Our study can only partly represent the Chinese population, especially population from southeast part of China. Fourthly, we didn't focus on the prognostic value of hypoechoic

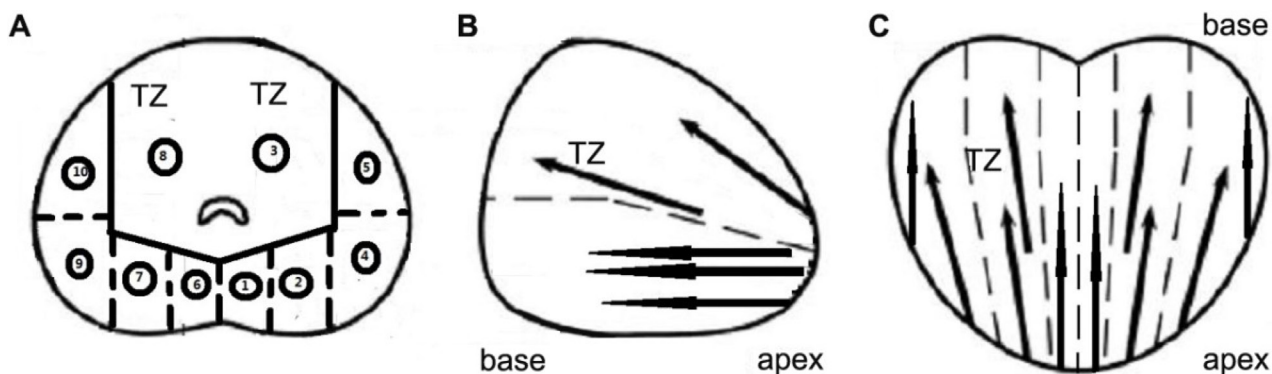

**Figure 2: Different sections of prostate and the location of prostate biopsy in 10-core TP-PBx procedure.** (A) Transverse section. (B) Sagittal section. (C) Coronal section. (A. 1. apex of peripheral zone in left lobe; 2. base of peripheral zone in left lobe; 3. transitional zone in left lobe; 4. body of peripheral zone in left lobe; 5. posterolateral of peripheral zone in left lobe; 6. apex of peripheral zone in right lobe; 7. base of peripheral zone in right lobe; 8. transitional zone in right lobe; 9. body of peripheral zone in right lobe; 10. posterolateral of peripheral zone in right lobe). TZ: transitional zone.

lesions in the current study. A long-time follow-up will be carried out to measure its value for evaluation of PCa progression.

## Abbreviations

PSA: prostate specific antigen; TP-PBx: transperineal prostate biopsy; DRE: digital rectal examination; TRUS: transrectal ultrasound; MRI: magnetic resonance image; PCa: prostate cancer; ROI: region of interest; SD: standard deviation. CI: confidence interval; PPV: positive predict value; NPV: negative predict value; TTBP: transperineal template biopsies of the prostate; TZ: transitional zone.

## Authors' contributions

Yang Tian: Project development, data analysis, manuscript writing; Zhang Limin: Project development, data collection, data analysis; Chen Yixin: Project development, data collection, manuscript writing; Cai Yehua: Data collection. Jiang Haowen: Project development, Manuscript Revision; Ding Qiang: Manuscript Revision. All authors reviewed and approved the manuscript.

## ACKNOWLEDGMENTS

We thank all the study participants, urologists and study coordinators for participating in the study.

## CONFLICTS OF INTEREST

None.

## FUNDING

The study was supported by Scientific Research Foundation of Huashan North Hospital (Grand No.2015101).

## REFERENCES

1. Siegel RL, Miller KD, Jemal A. Cancer statistics, 2016. *CA Cancer J Clin.* 2016; 66:7.
2. Brawley OW. Prostate cancer epidemiology in the United States. *World J Urol.* 2012; 30:195–200.
3. Yu H, Harris RE, Gao YT, Gao R, Wynder EL. Comparative epidemiology of cancers of the colon, rectum, prostate and breast in Shanghai, China versus the United States. *Int J Epidemiol.* 1991; 20:76–81.
4. Gu FL. Changing constituents of genitourinary cancer in recent 50 years in Beijing. *Chin Med J.* 2003; 116:1391–3.
5. Chen W, Zheng R, Baade PD, Zhang S, Zeng H, Bray F. Cancer statistics in China, 2015. *CA Cancer J Clin.* 2016; 66:115.
6. Alan JW, Louis RK, Alan WP, Craig AP. *Campbell-Walsh Urology 11th Edition.* Elsevier. 2016; Chapter 109:2579.
7. Watanabe H, Kaiho H, Tanaka M, Terasawa Y. Diagnostic application of ultrasonography of the prostate. *Invest Urol.* 1971; 8:548–59.
8. Watanabe H, Igari D, Tanahasi Y, Harada K, Saito M. Development and application of new equipment for transrectal ultrasonography. *J Clin Ultrasound.* 1974; 2:91–98.
9. Holm HH, Gammelgaard J. Ultrasonically guided precise needle placement in the prostate and the seminal vesicles. *J Urol.* 1981; 125:385–7.
10. Smith JA Jr. Transrectal ultrasonography for the detection and staging of carcinoma of the prostate. *J Clin Ultrasound.* 1996; 24:455–61.
11. Langer JE. The current role of transrectal ultrasonography in the evaluation of prostate carcinoma. *Semin Roentgenol.* 1999; 34:284–94.
12. Hugosson J, Carlsson S, Aus G, Bergdahl S, Khatami A, Lodding P, Pihl CG, Stranne J, Holmberg E, Lilja H. Mortality results from the Goteborg randomised population-based prostate-cancer screening trial. *Lancet Oncol.* 2010; 11:725–32.
13. Hall RR. Screening and early detection of prostate cancer will decrease morbidity and mortality from prostate cancer: the argument against. *Eur Urol.* 1996; 29:19–23.
14. Pallwein L, Mitterberger M, Pelzer A, Bartsch G, Strasser H, Pinggera GM, Aigner F, Gradl J, Zur Nedden D, Frauscher F. Ultrasound of prostate cancer: recent advances. *Eur Radiol.* 2008; 18:707–15.
15. Onur R, Littrup PJ, Pontes JE, Bianco FJ Jr. Contemporary impact of transrectal ultrasound lesions for prostate cancer detection. *J Urol.* 2004; 172:512–4.
16. Kuligowska E, Barish MA, Fenlon HM, Blake M. Predictors of prostate carcinoma: Accuracy of gray-scale and color Doppler US and serum markers. *Radiology.* 2001; 220:757–64.
17. Egawa S, Wheeler TM, Greene DR, Scardino PT. Unusual hyperechoic appearance of prostate cancer on transrectal ultrasonography. *Br J Urol.* 1992; 69:169–74.
18. Shinohara K, Wheeler TM, Scardino PT. The appearance of prostate cancer on transrectal ultrasonography: correlation of imaging and pathological examinations. *J Urol.* 1989; 142:76–82.
19. Malik R, Pandya VK, Naik D. Transrectal ultrasonography for evaluation of various benign and malignant prostatic lesions and their histopathological correlation. *Indian J Radiol Imaging.* 2004; 14:155–7.
20. Stilmant MM, Ewa K. Transrectal ultrasound screening for prostatic adenocarcinoma with histopathologic correlation. Factors affecting specificity. *Cancer.* 1993; 71:2041–7.
21. Rifkin MD, McGlynn T, Choi H. Echogenicity of prostate cancer correlated with histologic grade and stromal fibrosis: Endorectal US studies. *Radiology.* 1989; 170:549–52.

22. Heijmink SW, van Moerkerk H, Kiemeny LA, Witjes JA, Frauscher F, Barentsz JO. The incidence of hyperechoic prostate cancer intransrectal ultrasound-guided biopsy specimens. *Urology*. 2007; 70: 734–7.
23. Heijmink SW, van Moerkerk H, Kiemeny LA, Witjes JA, Frauscher F, Barentsz JO. A comparison of the diagnostic performance of systematic versus ultrasound-guided biopsies of prostate cancer. *Eur Radiol*. 2006; 30:927–38.
24. Loch T, Eppelmann U, Lehmann J, Wullich B, Loch A, Stöckle M. Transrectal ultrasound guided biopsy of the prostate: random sextant versus biopsies of sonomorphologically suspicious lesions. *World J Urol*. 2004; 22:357–60.
25. Onur R, Littrup PJ, Pontes JE, Bianco FJ Jr. Contemporary impact of transrectal ultrasound lesions for prostate cancer detection. *J Urol*. 2004; 172:512–4.
26. Toi A, Neill MG, Lockwood GA, Sweet JM, Tammsalu LA, Fleshner NE. The continuing importance of transrectal ultrasound identification of prostatic lesions. *J Urol*. 2007; 177:516–20.
27. Alan JW, Louis RK, Alan WP, Craig AP. *Campbell-Walsh Urology 11th Edition*. Elsevier. 2016; Chapter 109:2582.
28. Xu G, Yao M, Wu J, Guo L, Feng L, Wang S, Zhao L, Xu H, Wu R. Diagnostic Value of Different Systematic Prostate Biopsy Methods in the Detection of Prostate Cancer with Ultrasonographic Hypoechoic Lesions—A Comparative Study. *Urol Int*. 2015; 95:183–8.
29. Huang TB, Mao SY, Lu SM, Yu JJ, Luan Y, Gu X, Liu H, Zhou GC, Ding XF. Predictive value of neutrophil-to-lymphocyte ratio in diagnosis of prostate cancer among men who underwent template-guided prostate biopsy: A STROBE-compliant study. *Medicine*. 2016; 95:e5307.
30. Noh TI, Shin YS, Shim JS, Yoon JH, Kim JH, Bae JH, Moon du G, Park JY. Are hypoechoic lesions on transrectal ultrasonography a marker for clinically significant prostate cancer? *Korean J Urol*. 2013; 54:666–70.
31. Ellis WJ, Brawer MK. The significance of isoechoic prostatic carcinoma. *J Urol*. 1994; 152:2304–7.
32. Newton MR, Phillips S, Chang SS, Clark PE, Cookson MS, Davis R, Fowke JH, Herrell SD, Baumgartner R, Chan R, Mishra V, Blume JD, Smith JA Jr, et al. Smaller prostate size predicts high grade prostate cancer at final pathology. *J Urol*. 2010; 184:930–7.
33. Tonttila PP, Lantto J, Paakko E, Piippo U, Kauppila S, Lammentausta E, Ohtonen P, Vaarala MH. Prebiopsy Multiparametric Magnetic Resonance Imaging for Prostate Cancer Diagnosis in Biopsy-naive Men with Suspected Prostate Cancer Based on Elevated Prostate-specific Antigen Values: Results from a Randomized Prospective Blinded Controlled Trial. *Eur Urol*. 2016; 69:419–4.
34. Borkowetz A, Platzek I, Toma M, Laniado M, Baretton G, Froehner M, Koch R, Wirth M, Zastrow S. Comparison of systematic transrectal biopsy to transperineal magnetic resonance imaging/ultrasound-fusion biopsy for the diagnosis of prostate cancer. *BJU Int*. 2015; 116:873–9.
35. Wegelin O, van Melick HH, Hooft L, Bosch JL, Reitsma HB, Barentsz JO, Somford DM. Comparing Three Different Techniques for Magnetic Resonance Imaging-targeted Prostate Biopsies: A Systematic Review of In-bore versus Magnetic Resonance Imaging-transrectal Ultrasound fusion versus Cognitive Registration. Is There a Preferred Technique? *Eur Urol*. 2016; 71:517–31.
36. Ahallal Y, Sanchez-Salas R, Sivaraman A, Barret E, Secin FP, Validire P, Rozet F, Galiano M, Cathelineau X. Clinical performance of transperineal template guided mapping biopsy for therapeutic decision making in low risk prostate cancer. *Actas Urol Esp*. 2016; 40:615–20.
37. Nafe S, Mellon JK, Dormer JP, Khan MA. The role of transperineal template prostate biopsies in prostate cancer diagnosis in biopsy naive men with PSA less than 20 ng/ml. *Prostate Cancer Prostatic Dis*. 2014; 17:170–3.
38. Bittner N, Merrick GS, Andreini H, Taubenslag W, Allen ZA, Butler WM, Anderson RL, Adamovich E, Wallner KE. Prebiopsy PSA velocity not reliable predictor of prostate cancer diagnosis, Gleason score, tumor location, or cancer volume after TTMB. *Urology*. 2009; 74:171–6.
39. Barzell WE, Melamed MR, Cathcart P, Moore CM, Ahmed HU, Emberton M. Identifying candidates for active surveillance: an evaluation of the repeat biopsy strategy for men with favourable risk prostate cancer. *J Urol*. 2012; 188:762–8.
40. Onik G, Miessau M, Bostwick DG. Three-dimensional prostate mapping biopsy has a potentially significant impact on prostate cancer management. *J Clin Oncol*. 2009; 27:4321–6.
41. Mohamed Ismat A, Daniel H, Iqbal Singh S. The role of transperineal template biopsies of the prostate in the diagnosis of prostate cancer: a review. *Expert Rev Med Devices*. 2015; 12:175–82.
42. Losa A, Gadda GM, Lazzeri M, Lughezzani G, Cardone G, Freschi M, Lista G, Larcher A, Nava LD, Guazzoni G. Complications and quality of life After template-assisted transperineal prostate biopsy in patients eligible for focal therapy. *Urology*. 2013; 81:1291–6.
43. Tsivian M, Abern MR, Qi P, Polascik TJ. Short-term functional outcomes and complications associated with transperineal template prostate mapping biopsy. *Urology*. 2013; 82:166–70.
44. Willis S, Bott S, Montgomery B. Urinary retention following transperineal template prostate biopsy – study of risk factors. *J Clin Urol*. 2013; 6:55–8.
45. Epstein JI, Zelefsky MJ, Sjoberg DD, Nelson JB, Egevad L, Magi-Galluzzi C, Vickers AJ, Parwani AV, Reuter VE, Fine SW, Eastham JA, Wiklund P, Han M, et al. A Contemporary Prostate Cancer Grading System: A Validated Alternative to the Gleason Score. *Eur Urol*. 2016; 69:428–35.
